# Supplementary material for: “Bridge to the Literature”? Third‐Party Genetic Interpretation Tools and the Views of Tool Developers
Source: Springer Nature journal article supplement (doi:10.1007/s10897-018-0217-9), 2018-02-07
Supplement: MOESM2 [file 15445430]

Online Resource 2. Supplementary table of additional themes and example quotes from interviews with third-party tool developers.

| **Theme** | **Example quote** |
| --- | --- |
| Build the tool they want for themselves | "When I saw [DTC-GT raw] data files coming out — well, that's just a data file waiting to be input into a program. Just there wasn't a program yet. But me with my programming ability, my motivation for the genealogy, and these data files becoming available — well, that was just like the perfect storm if you want to put it that way. And I was in the right place at the right time to use the skills that I had to answer questions that I had." (1135) |
| Perceptions of tool users | [on fielding emails from users] "It's obvious some of these people have read up on it and have tried to understand, but obviously this is for the public, not all of them have degrees in biology or statistics or anything like that. So they obviously don't — they may or may not have a...background in this. But they're interested and I like seeing those emails" (1005) |
| Relationship with medical community | "We've had private contacts [with genetic counselors] that then evolved into shared screen sessions where we looked together at data and say, ‘Ok, here's what it means to us, what's it mean to you?’ And you know, we learn from each other. So we've had private one-on-one sessions with genetic counselors so that we understand better where each is coming from...And ultimately we're both trying to make sense of what's the right thing to tell somebody." (1336) |
| Views on regulation of third-party tools | "I think when I got into it, there was only very few players in the field, so there was a little bit of concern that maybe I would get a threatening letter from the FDA but...I think they're not as concerned with the third-party interpretation tools as they are with the one who's actually doing the testing." (1077) |
| Views on regulation of DTC-GT companies | "So, after the FDA letter to 23andMe, it became clear to me that FDA was ignorant. I mean they said, what if a woman chooses to have her breasts removed based on the 23andMe report...the whole idea that anybody would do anything, any kind of surgery based on 23andMe is ludicrous. And the whole idea that they came up with BRCA2 illustrates that they must be ignorant about fundamental aspects of human genetics." ( 1782) |
